# Supplementary material for: Urotensin II-related peptides, Urp1 and Urp2, control zebrafish spine morphology
Source: eLife. 2022 Dec 1;11:e83883. doi: 10.7554/eLife.83883 (PMC9836392; doi:10.7554/eLife.83883)
Supplement: Figure 1—source data 1. [file elife-83883-fig1-data1.xlsx]

## Sheet: Figure 1F and Fig 1—supp 2E
qPCR data - from Figure 1F and Figure 1—figure supplement 2E
		Av. Ct					∆CT				∆∆Ct				FC								Fold change			Fold change			SEM
		Rpl13	Urp1	Urp2	Pkd2l1		Urp1	Urp2	Pkd2l1		Urp1	Urp2	Pkd2l1		Urp1	Urp2	Pkd2l1		Urp1	Urp2	Pkd2l1		Urp1	Urp2		Urp1	Urp2		Urp1	Urp2
	WT_1	20.523	29.662	30.146	29.127		9.139	9.623	8.604		-0.472667	0.276333	0.009		1.38767	0.825687	0.993781		1.03595	1.01044	1.0002		2.72641	7.15524		1.88028	7.75657		0.475045	1.99411
	WT_2	21.183	30.797	30.485	29.808		9.614	9.302	8.625		0.00233333	-0.0446667	0.03		0.998384	1.03144	0.97942						1.83147	11.4716
	WT_3	20.715	30.797	29.83	29.271		10.082	9.115	8.556		0.470333	-0.231667	-0.039		0.721798	1.17419	1.0274						1.08298	4.64282
	Cfap298_1	20.032	30.618	32.494	29.186		10.586	12.462	9.154		0.974333	3.11533	0.559		0.508975	0.115396	0.678772		0.573533	0.152738	0.770874
	Cfap298_2	20.638	31.125	33.46	29.677		10.487	12.822	9.039		0.875333	3.47533	0.444		0.545128	0.0899126	0.735094
	Cfap298_3	20.928	31.125	32.258	29.677		10.197	11.33	8.749		0.585333	1.98333	0.154		0.666495	0.252905	0.898755
						Av. ∆Ct (WT)	9.61167	9.34667	8.595
																							Fold change			Fold change			SEM
		Rpl13	Urp1	Urp2	Pkd2l1		Urp1	Urp2	Pkd2l1		Urp1	Urp2	Pkd2l1		Urp1	Urp2	Pkd2l1		Urp1	Urp2	Pkd2l1		Urp1	Urp2		Urp1	Urp2		Urp1	Urp2
	WT_1	20.918	30.299	31.221	29.529		9.381	10.303	8.611		0.149333	-0.0566667	-0.241		0.901667	1.04006	1.18181		1.00604	1.00277	1.00915		1.70764	3.11234		2.02019	2.61746		0.159652	0.257186
	WT_2	20.76	29.775	31.025	29.617		9.015	10.265	8.857		-0.216667	-0.0946667	0.005		1.16205	1.06782	0.99654						2.23303	2.49147
	WT_3	20.59	29.889	31.101	29.678		9.299	10.511	9.088		0.0673333	0.151333	0.236		0.9544	0.900418	0.849096						2.11991	2.24856
	Sspo_1	20.542	30.695	32.483	29.569		10.153	11.941	9.027		0.921333	1.58133	0.175		0.528021	0.334173	0.885768		0.49954	0.387735	0.765714
	Sspo_2	20.195	30.369	31.777	29.567		10.174	11.582	9.372		0.942333	1.22233	0.52		0.520391	0.428589	0.697372
	Sspo_3	20.211	30.594	31.891	29.549		10.383	11.68	9.338		1.15133	1.32033	0.486		0.450209	0.400442	0.714002
						Av. ∆Ct (WT)	9.23167	10.3597	8.852
		Rpl13	Urp1	Urp2			Urp1	Urp2			Urp1	Urp2			Urp1	Urp2			Urp1	Urp2
	WT_1	20.605	30.447	30.908			9.842	10.303			0.303	0.340667			0.810565	0.789676			1.03496	1.07489
	WT_2	20.704	30.46	31.076			9.756	10.372			0.217	0.409667			0.860353	0.752797
	WT_3	20.418	29.437	29.63			9.019	9.212			-0.52	-0.750333			1.43396	1.68218
	Urp1_Urp2_1	20.704	34.606	34.98			13.902	14.276			4.363	4.31367			0.0485966	0.0502871			0.20353	0.315935
	Urp1_Urp2_2	20.803	31.947	32.489			11.144	11.686			1.605	1.72367			0.328736	0.302778
	Urp1_Urp2_3	20.456	32.095	31.168			11.639	10.712			2.1	0.749667			0.233258	0.594741
							9.539	9.96233
																			Relative expression			Fold change			Fold change			SEM
		Rpl13	Urp1	Urp2			Urp1	Urp2			Urp1	Urp2			Urp1	Urp2			Urp1	Urp2		Urp1	Urp2		Urp1	Urp2		Urp1	Urp2
	WT_1	21.034	30.052	31.0553			9.01801	10.0213			-0.0601402	-0.234919			1.04257	1.17684			1.00093	1.00888		1.08383	2.50911		0.989864	3.14307		0.0992571	0.653123
	WT_2	21.1823	30.3463	31.6739			9.164	10.4916			0.0858508	0.235423			0.942229	0.849436						0.791443	2.47097
	WT_3	20.9484	30.0008	31.2041			9.05244	10.2557			-0.0257106	-0.000503752			1.01798	1.00035						1.09432	4.44913
	Urp2_1	20.8331	29.9673	32.1816			9.13414	11.3485			0.0559945	1.09225			0.961931	0.469028			1.02756	0.345879
	Urp2_2	21.3252	30.1518	33.122			8.82656	11.7967			-0.251592	1.5405			1.19052	0.343766
	Urp2_3	20.7976	29.9801	33.2068			9.18248	12.4092			0.104329	2.15302			0.930238	0.224842
							9.07815	10.2562
		Rpl13	Urp1	Urp2			Urp1	Urp2			Urp1	Urp2			Urp1	Urp2			Urp1	Urp2		Fold change			Fold change			SEM
	WT_1	20.8378	30.0925	30.0279			9.25472	9.19014			0.0830027	0.00623067			0.944091	0.995691			1.00162	1.00021		Urp1	Urp2		Urp1	Urp2		Urp1	Urp2
	WT_2	20.9625	30.1626	30.1787			9.20007	9.21621			0.0283496	0.0323041			0.980541	0.977857						3.00624	3.4398		4.66901	2.66682		0.831784	0.551867
	WT_3	20.7868	29.8472	29.9322			9.06037	9.14537			-0.111352	-0.0385348			1.08024	1.02707						5.45576	2.96263
	Urp1_Urp2_1	20.9139	31.7566	31.8864			10.8427	10.9725			1.67096	1.78856			0.314043	0.289462			0.229527	0.420747		5.54503	1.59802
	Urp1_Urp2_2	20.69	32.3378	31.473			11.6479	10.7831			2.47613	1.59918			0.179726	0.330064
	Urp1_Urp2_3	20.7084	32.2399	30.53			11.5316	9.82166			2.35984	0.63775			0.194812	0.642715
							9.17172	9.18391
																						Fold change			Av Fold Chang			SEM
																			Urp1	Urp2		Urp1	Urp2		Urp1	Urp2		Urp1	Urp2
	WT_1	21.3918	30.1916	30.0442			8.79981	8.65246			-0.38001	-1.16843			1.30135	2.24767			1.02983	1.27544		3.37171	0.770722		3.01971	0.47309		0.59923
	WT_2	20.9538	30.3409	31.1488			9.38715	10.195			0.207331	0.374149			0.866138	0.77156						3.4504	0.279577
	WT_3	20.7693	30.0662	30.8994			9.29696	10.1301			0.11714	0.309196			0.922013	0.807091						3.98726	0.666625
	WT_4	20.5295	29.7649	30.8355			9.23536	10.306			0.0555387	0.485086			0.962235	0.714454						1.26946	0.175434
	Urp1	21.2515	31.8048	29.5283			10.5533	8.27674			1.37347	-1.54415			0.385962	2.91632			0.289409	2.29559
	Urp1	21.0748	32.2487	29.4312			11.1739	8.35636			1.9941	-1.46453			0.251025	2.75974
	Urp1	21.0375	32.3299	30.5825			11.2924	9.54504			2.11254	-0.275856			0.23124	1.21071
	Urp1	20.1013	29.6809	27.8963			9.57958	7.79498			0.399758	-2.02592			0.757985	4.07251
							9.17982	9.82089

## Sheet: Figure 1H
Body curve angles in crispants
		Uninjected	Cas9-only	cfap298	sspo	urp1	urp2	urp1;urp2
	Rep 1	187.108	195.229	125.365	102.516	191.531	183.371	195.059
	Rep 2	193.823	194.36	129.96	131.613	194.915	192.417	192.019
	Rep 3	193.937	190.44	116.081	109.677	194.735	188.928	191.39
	Rep 4	191.614				190.982	191.062	191.401
	Rep 5	193.867						192.58
	Mean	192.07	193.343	123.802	114.602	193.041	188.945	192.49
	STDEV	2.94162	2.55141	7.07034	15.1609	2.07384	3.98342	1.51885
