# Supplementary material for: Urotensin II-related peptides, Urp1 and Urp2, control zebrafish spine morphology
Source: eLife. 2022 Dec 1;11:e83883. doi: 10.7554/eLife.83883 (PMC9836392; doi:10.7554/eLife.83883)
Supplement: Figure 2—figure supplement 1—source data 1. [file elife-83883-fig2-figsupp1-data1.xlsx]

## Sheet: Figure 2—figure supplement 1C
Position of curve apex
		Number of fish
	Vertebrae	urp1∆P;urp2∆P	uts2r3(b1436)	cfap298(tm304)	cfap298(tm304);urp1∆P;urp2∆P
	1	0	0	0	0
	2	0	0	0	0
	3	0	0	0	0
	4	0	0	0	0
	5	0	0	0	0
	6	0	0	0	1
	7	0	0	0	2
	8	0	0	1	0
	9	1	1	3	0
	10	0	0	4	0
	11	2	1	4	0
	12	0	0	0	0
	13	3	1	0	4
	14	3	4	1	1
	15	0	0	1	0
	16	1	2	2	0
	17	0	0	1	2
	18	1	0	5	1
	19	3	0	2	2
	20	1	1	0	0
	21	4	1	2	0
	22	0	1	0	1
	23	0	2	3	1
	24	1	2	0	2
	25	4	1	5	2
	26	4	1	4	0
	27	0	0	1	0
	28	1	2	0	1
	29	1	1	0	3
	30	0	0	0	1
	31	0	0	0	0

## Sheet: Figure 2—figure supplement 1D
Cobb angle measurements for individual fish in the sagittal plane.
cfap298(tm304)	Individual	Angle 1	Angle 2	Angle 3	Angle 4	Angle 5
	1	108.946	83.698	83.974
	2	83.676	101.674	78
	3	68.728	69.906	87.843
	4	45.253	84.419	74.79
	5	87.965	76.273	86.321	76.04
	6	40.758	59.029	128.733	51.45
	7	60.958	93.289	80.598	56.804
	8	97.812	88.172	80.839
	9	95.052	105.388	65.223
	10	72.408	81.691	85.768
	11	84.673	74.224	71.063
	12	83.003	88.942	81.524
cfap298(tm304);urp1∆P;urp2∆P	1	36.263	62.114	62.945	70.439	51.414
	2	83.722	87.983	64.742
	3	75.985	91.912	79.363	37.532
	4	79.932	81.294	88.326	85.163
	5	64.439	72.331	70.75	95.67
	6	64.673	67.777	46.51	85.112

## Sheet: Figure 2—figure supplement 1E
Total Cobb angles by sex
cfap298(tm304)	Individual
	1	276.618	Male
	2	263.35	Male
	3	226.477	Male
	4	204.462	Male
	5	326.599	Male		Mean (male)	STDEV (male)
	6	279.97	Male		267.018	40.7978
	7	291.649	Male
	8	266.823	Female		Mean (female)	STDEV (female)		TTEST
	9	265.663	Female		251.156	16.1088		0.433597
	10	239.867	Female
	11	229.96	Female
	12	253.469	Female
cfap298(tm304);urp1∆P;urp2∆P	1	283.175	Male		Mean (male)	STDEV (male)
	2	236.447	Male		268.138	27.4571
	3	284.792	Male
	4	334.715	Female		Mean (female)	STDEV (female)		TTEST
	5	303.19	Female		300.659	35.3894		0.276966
	6	264.072	Female
