# Supplementary material for: Urotensin II-related peptides, Urp1 and Urp2, control zebrafish spine morphology
Source: eLife. 2022 Dec 1;11:e83883. doi: 10.7554/eLife.83883 (PMC9836392; doi:10.7554/eLife.83883)
Supplement: Figure 2—source data 1. [file elife-83883-fig2-data1.xlsx]

## Sheet: Figure 2D
Cobb angle measurements for individual fish in the sagittal plane.
urp1∆P;urp2∆P	Individual	Angle 1	Angle 2	Angle 3	Angle 4
	1	12.931	60.957	57.616
	2	56.259	91.376	90
	3	60.299	105.602	57.4
	4	33.69	34.901	58.882	57.642
	5	15.95	70.46	59.95
	6	16.705	71.87	67.83	35.6
	7	73.3	79.574	55.257
	8	61.316	71.502	73.142
	9	59.105	58.171	63.34	66.626
uts2r3(b1436)	1	20.795	31.201	61.314	100.224
	2	33.896	11.997	42.326
	3	57.848	19.717	72.371
	4	69.083	49.651
	5	53.437	75.104
	6	30.145	109.188
	7	61.137	37.8	42.893	77.855
	8	51.614	58.863

## Sheet: Figure 2E
Total Cobb angles
urp1∆P;urp2∆P	Individual								urp1∆P;urp2∆P	Individual
	1	131.504								1	131.504	Male
	2	237.635								2	237.635	Male
	3	223.301								3	223.301	Male
	4	185.115								4	185.115	Male
	5	146.36								5	146.36	Female		Mean (male)	STDEV (male)
	6	192.005								6	192.005	Female		194.389	47.4224
	7	208.131								7	208.131	Female
	8	205.96		Mean	STDEV					8	205.96	Female		Mean (female)	STDEV (female)		TTEST
	9	247.242		197.473	38.8743					9	247.242	Female		199.94	36.3132		0.84741
uts2r3(b1436)	1	213.534							uts2r3(b1436)	1	213.534	Male
	2	88.219								2	88.219	Male
	3	149.936								3	149.936	Male
	4	118.734								4	118.734	Male		Mean (male)	STDEV (male)
	5	128.541								5	128.541	Male		139.793	46.8257
	6	139.333								6	139.333	Female
	7	219.685		Mean	STDEV		TTEST			7	219.685	Female		Mean (female)	STDEV (female)		TTEST
	8	110.477		146.057	47.3573		0.026601			8	110.477	Female		156.498	56.5914		0.665215

## Sheet: Figure 2F
Position of curve apex
		Number of fish
	Vertebrae	urp1∆P;urp2∆P	uts2r3(b1436)
	1	0	0
	2	0	0
	3	0	0
	4	0	0
	5	0	0
	6	0	0
	7	0	0
	8	0	0
	9	1	1
	10	0	0
	11	2	1
	12	0	0
	13	3	1
	14	3	4
	15	0	0
	16	1	2
	17	0	0
	18	1	0
	19	3	0
	20	1	1
	21	4	1
	22	0	1
	23	0	2
	24	1	2
	25	4	1
	26	4	1
	27	0	0
	28	1	2
	29	1	1
	30	0	0
	31	0	0
