# Supplementary material for: Urotensin II-related peptides, Urp1 and Urp2, control zebrafish spine morphology
Source: eLife. 2022 Dec 1;11:e83883. doi: 10.7554/eLife.83883 (PMC9836392; doi:10.7554/eLife.83883)
Supplement: Figure 3—source data 1. [file elife-83883-fig3-data1.xlsx]

## Sheet: Figure 3C
Standard length (mm) over time
	dpf	WT	urp1∆P;urp2∆P			WT		urp1∆P;urp2∆P
	3	3.217	2.984			Mean	STDEV	Mean	STDEV
	3	3.109	3.023		3	3.1574	0.0391765	3.0168	0.0355626
	3	3.155	3.023		5	3.4494	0.150307	3.2418	0.217912
	3	3.143	2.984		7	3.772	0.126196	3.4248	0.101849
	3	3.163	3.07		9	5.1722	0.557282	3.9238	0.669783
					11	6.062	0.0952497	5.859	0.396182
	5	3.647	3.023		13	6.8682	0.229763	6.2482	0.328376
	5	3.244	3.093		15	7.73133	0.353263	7.13522	0.569483
	5	3.384	3.171		17	8.81744	0.341803	8.34218	0.434396
	5	3.519	3.364
	5	3.453	3.558
	7	3.69	3.589
	7	3.616	3.442
	7	3.756	3.341
	7	3.891	3.411
	7	3.907	3.341
	9	5.62	3.442
	9	5.504	3.736
	9	5.155	3.302
	9	5.357	4.961
	9	4.225	4.178
	11	6.225	5.473
	11	6.062	5.512
	11	5.984	5.767
	11	6.023	6.341
	11	6.016	6.202
	13	7.047	5.907
	13	6.736	6.388
	13	7.124	5.899
	13	6.558	6.628
	13	6.876	6.419
	15	7.597	7
	15	7.845	6.822
	15	7.45	6.605
	15	7.922	8.163
	15	8.271	7.899
	15	7.698	6.519
	15	7.054	7.31
	15	7.698	6.752
	15	8.047	7.147
	17	8.597	8
	17	9.38	7.605
	17	8.62	7.426
	17	9.426	8.341
	17	8.357	7.729
	17	8.977	8.736
	17	8.155	8.581
	17	8.705	8.488
	17	9	8.806
	17	8.543	8.388
	17	9.008	8.744
	17	9.078	8.822
	17	8.674	8.341
	17	8.76	7.907
	17	8.76	8.411
	17	9.039	8.938
			9.062
			8.45
			8.14
			8.256
			8
			8.357

## Sheet: Figure 3F
Vertebral aspect ratios
	Length aspect ratio
	WT	Vertebrae	WT_1	WT_2	WT_3	WT_4
		11	0.988615	1.03691	1.05516	1.01465
		12	1.01634	1.02523	0.998659	1.00729
		13	1.05257	1.01937	0.989785	1.0042
		14	1.00377	1.01483	0.976953	1.01993
		15	0.976306	1.00464	0.991306	0.945912
		16	0.967733	0.988121	1.00589	1.0078
	urp1∆P;urp2∆P		Urp_1	Urp_2	Urp_3	Urp_4
		11	0.985529	0.990133	1.00043	0.996219
		12	0.973845	1.01816	0.954135	0.998476
		13	0.977616	1.02373	1.02788	0.970285
		14	1.04878	1.0113	1.05837	1.02198
		15	1.01052	0.972293	0.992386	0.952877
		16	0.96149	1.03582	0.996732	0.917896
	Height aspect ratio
	WT	Vertebrae	WT_1	WT_2	WT_3	WT_4
		11	0.985923	0.950849	1.04268	0.973652
		12	0.981261	1.02253	1.0148	1.02431
		13	0.967631	0.979986	1.02053	0.975224
		14	0.971439	0.96734	1.02341	0.979045
		15	0.998868	0.990387	0.993452	0.998839
		16	0.980441	0.94232	0.998678	0.982892
	urp1∆P;urp2∆P		Urp_1	Urp_2	Urp_3	Urp_4
		11	0.985529	0.990133	1.00043	0.996219
		12	0.973845	1.01816	0.954135	0.998476
		13	0.977616	1.02373	1.02788	0.970285
		14	1.04878	1.0113	1.05837	1.02198
		15	1.01052	0.972293	0.992386	0.952877
		16	0.96149	1.03582	0.996732	0.917896
