# Supplementary material for: Urotensin II-related peptides, Urp1 and Urp2, control zebrafish spine morphology
Source: eLife. 2022 Dec 1;11:e83883. doi: 10.7554/eLife.83883 (PMC9836392; doi:10.7554/eLife.83883)
Supplement: Figure 4—source data 1. [file elife-83883-fig4-data1.xlsx]

## Sheet: Figure 4E
Total Cobb angles
urp1∆P;urp2∆P	Individual
	1	131.504
	2	237.635
	3	223.301
	4	185.115
	5	146.36
	6	192.005
	7	208.131		Mean	STDEV
	8	205.96		197.473	38.8743
	9	247.242
cfap298(tm304)	1	266.823
	2	265.663
	3	239.867
	4	229.96						TTEST
	5	253.469						urp1∆P;urp2∆P vs cfap298(tm304)	0.000717765
	6	276.618						urp1∆P;urp2∆P vs cfap298(tm304);urp1∆P;urp2∆P	0.000629651
	7	263.35						cfap298(tm304) vs cfap298(tm304);urp1∆P;urp2∆P	0.164546
	8	226.477
	9	204.462
	10	326.599		Mean	STDEV
	11	279.97		260.409	32.6949
	12	291.649
cfap298(tm304);urp1∆P;urp2∆P	1	283.175
	2	236.447
	3	284.792
	4	334.715		Mean	STDEV
	5	303.19		284.399	33.4635
	6	264.072

## Sheet: Figure 4F
Quantitation of lateral curvature
WT	Vertebrae	WT_1	WT_2	WT_3	WT_4	WT_5
	1	0.296431	-0.249631	0	0	-0.3744
	2	0	0.499169	0.249631	0.249631	0.5616
	3	0	0.124769	-0.124769	0.7488	0.5616
	4	0.249538	-0.124862	-0.124769	-0.499169	-0.3744
	5	-0.3744	0.499169	-0.124769	0.249631	0.7488
	6	0	0.3744	0.249538	0.3744	0.3744
	7	0.124862	-0.499169	0.249538	-0.249631	-0.5616
	8	-0.124769	0.249631	0.499169	0.499169	0.3744
	9	0	0.124769	0.124769	0.124769	0.3744
	10	0.3744	-0.3744	0	-0.249631	-0.3744
	11	0	0.124862	0.249631	0.3744	0.1872
	12	0.124769	0	-0.124769	0.124769	0.5616
	13	0.124769	0	-0.3744	0	-0.3744
	14	0.249631	-0.124862	0.249538	-0.3744	0.3744
	15	0	-0.124769	0.124862	-0.124769	-0.3744
	16	-0.249538	0.124769	-0.249538	-0.124769	0.1872
	17	0.124862	-0.124862	-0.124769	-0.249538	0
	18	0.3744	-0.3744	0	-0.249631	-0.1872
	19	-0.249538	0.249538	0.124769	0.249631	0.5616
	20	0.249631	-0.249631	0.124769	0	0
	21	0.3744	-0.499169	-0.156031	-0.249538	-0.936
	22	-0.3744	0.249631	0.124769	0.0312624	0.3744
	23	0.124769	-0.624031	-0.3744	-0.623938	-0.5616
	24	0.499262	-0.499169	-0.249631	-0.7488	-0.5616
	25	-0.3744	0.624031	0.3744	0.124862	0.936
	26	0.124769	-0.124769	-0.499169	-0.623938	-1.1232
	27	0.499169	0.7488	-0.124769	-0.499262	-0.936
	28	-0.3744	1.74723	0.249631	0.499169	0.5616
	29	0.124862	-0.998338	-0.3744	-0.7488	-0.1872
	30	0.3744	-0.7488	-0.249631	-0.624031	-0.1872
	31	-0.3744	0.124862	0.249538	0.499169	0.3744
urp1∆P;urp2∆P		Urp_1	Urp_2	Urp_3	Urp_4	Urp_5	Urp_6	Urp_7	Urp_8
	1	-0.1404	0.499169	0	0.6084	1.6848	0.5616	0	0.3744
	2	-0.5616	0	0.499169	0.3744	1.1232	0.2808	0	0
	3	-0.1872	0.3744	0.7488	-0.1872	0.3744	0	0.124769	-0.249631
	4	-0.1872	0	0.124769	-0.3744	0.5616	-0.0624312	0.3744	0.124769
	5	-0.3744	0	0.3744	0.1872	0.3744	0.249631	0.624031	0.124862
	6	-0.7488	-0.124769	0.249631	0.1872	0.936	0.124769	-0.249631	-0.249631
	7	-0.3744	-0.124862	-0.124769	0	0.936	-0.124769	0.3744	0.124769
	8	-0.1872	-0.3744	0.124769	0	0.3744	0.3744	0	0.249631
	9	-0.7488	-0.124769	0.249631	0.1872	0.1872	-0.3744	0.249631	0
	10	0	0.124769	0	0	0.3744	-0.249631	0.124769	0.249631
	11	-0.7488	0.124862	-0.124862	0.1872	0.1872	-0.124769	0.124862	0.623938
	12	-0.5616	0.0311688	-0.499169	-0.1872	0	-0.5616	-0.249631	0.3744
	13	0.936	-0.3744	0.1872	0.3744	0.1872	0.3744	-0.7488	0.624031
	14	0	-0.124769	-0.3744	0.3744	0.3744	0.3744	-1.1232	0.3744
	15	0.5616	0	0.1872	0	0	0.1872	-0.624031	-0.3744
	16	0.5616	-0.124862	-0.1872	0.5616	0.1872	0.1872	-0.3744	-0.7488
	17	0.3744	0.249631	0	-0.1872	0.1872	0	-0.623938	-1.1232
	18	0	1.24797	0	0.3744	-0.5616	-0.5616	-0.249631	-0.1872
	19	0.7488	0.998431	-0.3744	0	-0.3744	-0.624031	-0.499169	-0.3744
	20	0.5616	0.249631	0.1872	0.1872	-0.1872	-0.124769	0.124769	-0.1872
	21	0	0.499169	0.530431	-0.1872	-0.3744	0.3744	-0.3744	-0.1872
	22	0.436831	0.3744	0.499169	-0.1872	-0.5616	-0.124769	-0.124769	-0.624031
	23	-0.249631	-0.249631	0	0.3744	-0.936	-0.249631	0.623938	-0.3744
	24	-0.124769	0.124862	-0.124769	0	-0.8424	-0.249631	1.24806	-0.3744
	25	0.249538	-0.124862	1.4976	-0.1872	-0.7488	0.499262	0.873569	0.124862
	26	0.124862	0.3744	2.12154	0	-0.499169	0.249538	2.2464	-0.124862
	27	-0.249631	0.499262	1.37283	0.3744	-0.998431	-0.499169	0.7488	-0.124769
	28	0.3744	0.7488	1.37283	-0.3744	-0.249631	0.249631	0.8424	0.249631
	29	0.499169	0.3744	0.3744	0.3744	-0.873569	0.249538	0.936	-0.499262
	30	0.249631	0.249538	-0.7488	-0.1872	-0.873569	-0.3744	0.936	-0.249538
	31	0.249631	0	-0.499262	-0.5616	-0.124862	-0.249538	0.1872	-0.3744
uts2r3(b1436)		Uts_1	Uts_2	Uts_3
	1	0.3744	0	-0.249631
	2	-0.5616	-0.124862	-0.249538
	3	0	0.124862	0
	4	0	-0.124862	0
	5	0	0.124862	-0.124862
	6	0.5616	0.124769	0
	7	0.1872	0.124769	0.124862
	8	0.7488	0	0.124769
	9	0	0	0
	10	0.7488	-0.0311688	0.249631
	11	-0.124769	0.3744	-0.0624312
	12	0.623938	0.3744	0.1872
	13	0.3744	0.124769	0
	14	0.3744	-0.124769	0
	15	0.249631	-0.124769	0.2808
	16	0.124769	0.124769	0.0936
	17	-0.249538	0.499169	0.1872
	18	0.124769	0.124862	0.2808
	19	-0.249631	0.249538	0.1872
	20	-0.249538	0.156031	0.1872
	21	-0.3744	0.0936	-0.0936
	22	-0.124862	0.1872	0
	23	-0.7488	-0.5616	0.2808
	24	-1.1232	-0.6552	-0.3744
	25	-1.99677	-0.468	-0.1872
	26	-2.74557	-0.3744	-0.2808
	27	-1.24806	-0.3744	-0.0936
	28	-0.7488	0	0
	29	-0.3744	0	0.1872
	30	0.7488	0.6552	0
	31	0.780062	0.8424	-0.0936
cfap298(tm304)		C_1	C_2	C_3
	1	0.0468	0.5616	0.3744
	2	0.7488	0.1872	0.3744
	3	0	-0.3744	0.7488
	4	0.1872	-1.1232	0
	5	-0.1872	-2.2464	0.5616
	6	-1.1232	-3.3696	0.3744
	7	-2.808	-2.808	0.7488
	8	-2.808	2.6208	-0.3744
	9	-1.6848	2.808	-0.3744
	10	-1.4976	3.1824	-1.4976
	11	1.4976	2.808	-0.7488
	12	2.4336	1.4976	1.4976
	13	2.6208	1.3104	1.1232
	14	2.2464	-0.936	-0.936
	15	1.1232	-2.2464	-0.5616
	16	-0.5616	-3.9312	0
	17	-1.6848	-3.9312	-1.872
	18	-2.9952	-3.9312	-1.3104
	19	-3.9312	-2.9952	1.1232
	20	-3.1824	-1.872	1.6848
	21	-3.3696	-0.5616	1.1232
	22	-2.6208	-0.3744	0
	23	-1.3104	0.936	-2.808
	24	2.808	-1.872	-2.6208
	25	2.4336	0.936	-2.4336
	26	3.5568	3.9312	0.936
	27	3.3696	2.2464	1.3104
	28	2.0592	1.6848	1.872
	29	1.3104	-0.3744	1.4976
	30	0.1872	-2.4336	1.1232
	31	-0.936	-3.1824	0.5616
cfap298(tm304);urp1∆P;urp2∆P		Triple_1	Triple_2	Triple_3	Triple_4	Triple_5	Triple_6
	1	1.3572	0.7488	-1.6848	0.234	0.5616	1.1232
	2	1.1232	2.0592	-1.6848	-0.7488	0.5616	0.936
	3	1.3104	1.6848	-0.3744	-0.5616	-0.1872	0
	4	2.0592	2.808	-1.3104	0.1872	-0.3744	0.1872
	5	0.1872	2.4336	0.7488	0.7488	-0.1872	-0.3744
	6	-0.3744	0.1872	1.872	0.7488	-0.7488	1.1232
	7	-0.936	-1.4976	3.1824	0.5616	-0.5616	0.3744
	8	-3.3696	-2.9952	2.9952	0.5616	-0.1872	0
	9	-2.2464	-3.3696	3.1824	-0.1872	0.1872	-1.4976
	10	-0.936	-3.3696	3.1824	-1.3104	0.936	-2.6208
	11	1.1232	-3.3696	3.3696	-2.4336	0.936	-2.6208
	12	2.4336	-0.7488	2.808	-2.0592	0.5616	-2.2464
	13	2.0592	2.0592	-1.4976	-0.3744	0.3744	-0.7488
	14	1.6848	2.2464	-3.744	2.0592	0.5616	0.936
	15	1.1232	2.0592	-5.616	3.744	0.3744	1.3104
	16	0.1872	0.1872	-3.5568	5.0544	0.3744	1.6848
	17	-0.7488	-0.1872	-1.872	3.744	-0.1872	2.6208
	18	-0.936	-1.872	0.3744	1.6848	-0.3744	1.872
	19	-1.6848	-1.4976	1.3104	0.5616	-0.7488	-0.3744
	20	-1.4976	-1.872	0.5616	0.3744	-0.1872	-0.936
	21	0	-1.4976	-0.936	1.872	0.5616	-1.3104
	22	0.7488	1.4976	-1.3104	1.1232	0.7488	-0.7488
	23	-1.1232	1.6848	1.4976	1.6848	0.5616	0.3744
	24	-1.872	1.872	1.3104	1.3104	0.1872	0.936
	25	-1.3104	1.3104	1.3104	-0.936	-0.1872	0.1872
	26	-1.4976	0.936	2.0592	-2.2464	-0.1872	1.4976
	27	-1.872	0.1872	0.3744	-2.808	0	0.936
	28	0.1872	0.3744	0.5616	-0.936	0.936	0.7488
	29	0.936	0.3744	-2.808	-0.1872	0.1872	-0.5616
	30	1.1232	0.1872	1.6848	0.936	-0.936	-1.4976
	31	2.4336	0.7488	0.5616	-0.3744	-0.936	-0.7488
